# Supplementary material
Source: PubMed Central journal article supplement (PMC5407720)
Supplement: ASN.2016040387SupplementaryData.pdf [file ASN.2016040387SupplementaryData.pdf]

## SUPPLEMENTAL METHODS

### List of the known genes associated with nephrotic syndrome:

| Gene            | Inheritance        | Disease                                                                                                                             |
|-----------------|--------------------|-------------------------------------------------------------------------------------------------------------------------------------|
| <i>ACTN4</i>    | AD                 | Familial and sporadic SRNS (usually adult)                                                                                          |
| <i>ADCK4</i>    | AR                 | SRNS                                                                                                                                |
| <i>ALG1</i>     | AR                 | Congenital disorder of glycosylation                                                                                                |
| <i>ANLN</i>     | AD                 | FSGS (mainly adult)                                                                                                                 |
| <i>ARHGAP24</i> | AD                 | FSGS                                                                                                                                |
| <i>ARHGDI1</i>  | AR                 | Congenital nephrotic syndrome                                                                                                       |
| <i>CD151</i>    | AR                 | NS, pretibial bullous skin lesions, neurosensory deafness, bilateral lacrimal duct stenosis, nail dystrophy, and -thalassemia minor |
| <i>CD2AP</i>    | AD/AR              | FSGS/SRNS                                                                                                                           |
| <i>CFH</i>      | AR                 | MPGN type II + NS                                                                                                                   |
| <i>COL4A3</i>   | AR                 | Alport's disease/FSGS                                                                                                               |
| <i>COL4A4</i>   | AR                 | Alport's disease/FSGS                                                                                                               |
| <i>COL4A5</i>   | X-linked AR        | Alport's disease/FSGS                                                                                                               |
| <i>COQ2</i>     | AR                 | Mitochondrial disease/isolated nephropathy                                                                                          |
| <i>COQ6</i>     | AR                 | NS +/- sensorineural deafness; DMS                                                                                                  |
| <i>CRB2</i>     | AR                 | SRNS                                                                                                                                |
| <i>CUBN</i>     | AR                 | Intermittent nephrotic range proteinuria +/- with epilepsy                                                                          |
| <i>DGKE</i>     | AR                 | Hemolytic-Uremic Syndrome + SRNS                                                                                                    |
| <i>E2F3</i>     | AD                 | FSGS+mental retardation (whole gene deletion)                                                                                       |
| <i>EMP2</i>     | AR                 | Childhood-onset SRNS and SSNS                                                                                                       |
| <i>INF2</i>     | AD                 | Familial and sporadic SRNS, FSGS-associated Charcot-Marie-Tooth neuropathy                                                          |
| <i>ITGA3</i>    | AR                 | Congenital interstitial lung disease, nephrotic syndrome, and mild epidermolysis bullosa                                            |
| <i>ITGB4</i>    | AR                 | epidermolysis bullosa and pyloric atresia + FSGS                                                                                    |
| <i>KANK1</i>    | AR                 | SSNS                                                                                                                                |
| <i>KANK2</i>    | AR                 | SSNS/SDNS +/- hematuria                                                                                                             |
| <i>KANK4</i>    | AR                 | SRNS + haematuria                                                                                                                   |
| <i>LAMB2</i>    | AR                 | Pierson syndrome                                                                                                                    |
| <i>LMNA</i>     | AD                 | Familial partial lipodystrophy + FSGS                                                                                               |
| <i>LMX1B</i>    | AD                 | Nail patella syndrome; also FSGS without extrarenal involvement                                                                     |
| <i>MYO1E</i>    | AR                 | Familial SRNS                                                                                                                       |
| <i>NUP93</i>    | AR                 | Childhood SRNS                                                                                                                      |
| <i>NUP107</i>   | AR                 | Childhood SRNS                                                                                                                      |
| <i>NUP205</i>   | AR                 | Childhood SRNS                                                                                                                      |
| <i>NPHS1</i>    | AR                 | Congenital nephrotic syndrome/SRNS                                                                                                  |
| <i>NPHS2</i>    | AR                 | CNS, SRNS                                                                                                                           |
| <i>NXF5</i>     | X-linked recessive | FSGS with co-segregating heart block disorder                                                                                       |
| <i>OCRL</i>     | X-linked recessive | Dent disease2, Lowe syndrome, +/- FSGS, +/- nephrotic range proteinuria                                                             |
| <i>PAX2</i>     | AD                 | adult onset FSGS without extrarenal manifestations                                                                                  |
| <i>PDSS2</i>    | AR                 | Leigh syndrome                                                                                                                      |
| <i>PLCe1</i>    | AR                 | Congenital nephrotic syndrome/SRNS                                                                                                  |
| <i>PMM2</i>     | AR                 | Congenital disorder of glycosylation                                                                                                |
| <i>PODXL</i>    | AD                 | FSGS                                                                                                                                |

|                 |                     |                                                                                                                          |
|-----------------|---------------------|--------------------------------------------------------------------------------------------------------------------------|
| <i>PTPRO</i>    | AR                  | NS                                                                                                                       |
| <i>SCARB2</i>   | AR                  | Action myoclonus renal failure syndrome +/-hearing loss                                                                  |
| <i>SMARCAL1</i> | AR                  | Schimke immuno-osseous dysplasia                                                                                         |
| <i>SYNPO</i>    | AD                  | sporadic FSGS (promoter mutations)                                                                                       |
| <i>TRPC6</i>    | AD                  | Familial and sporadic SRNS (mainly adult)                                                                                |
| <i>TTC21B</i>   | AR                  | FSGS with tubulointerstitial involvement                                                                                 |
| <i>WDR73</i>    | AR                  | Galloway-Mowat syndrome (microcephaly and SRNS)                                                                          |
| <i>WT1</i>      | AD                  | Sporadic SRNS (children—may be associated with abnormal genitalia); Denys-Drash and Frasier syndrome                     |
| <i>XPO5</i>     | AR                  | Childhood SRNS                                                                                                           |
| <i>ZMPSTE24</i> | AR                  | Mandibuloacral dysplasia with FSGS                                                                                       |
| <i>MYH9</i>     | AD/assoc.           | MYH9-related disease; Epstein and Fechtner syndromes                                                                     |
| <i>APOL1</i>    | G1, G2 risk alleles | Increased susceptibility to FSGS and ESRD in African Americans, Hispanic Americans and in individuals of African descent |

**Table S1. 53 genes associated with steroid-resistant nephrotic syndrome (SNRS) of congenital, childhood, or adult onset, familial and sporadic origin, different syndrome association/risk factors are shown.**<sup>1-8</sup>

#### Mapping statistics - Coverage – whole exome

|                                       | Mean   | Std. Error |
|---------------------------------------|--------|------------|
| Reads mapped to target (%)            | 73.16  | 0.25       |
| Reads mapped to target plus 150bp (%) | 82.25  | 0.35       |
| Mean coverage                         | 115.90 | 1.48       |
| Accessible target bases 1x (%)        | 98.50  | 0.04       |
| Accessible target bases 5x (%)        | 97.35  | 0.07       |
| Accessible target bases 10x (%)       | 96.06  | 0.11       |
| Target bases 20x (%)                  | 92.60  | 0.21       |

**Table S2. Coverage – whole exome**

**SUPPLEMENTAL RESULTS**

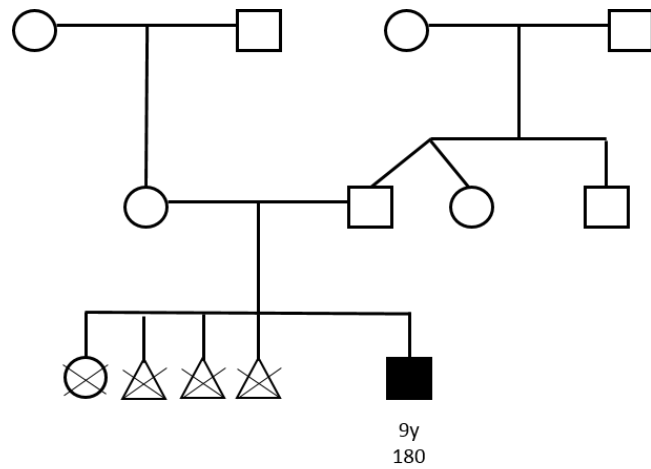

**Figure S1. Family pedigree of patient 180.**

Black filled square represents patient 180 diagnosed with SRNS at the age of 9 years who is a compound heterozygote for MAGI2; variant in exon 1 was inherited from the Father and in exon 20 from the Mother. Crossed triangles represent miscarriages and the crossed circle represents stillborn female. DNA samples from other members of the family were not available.

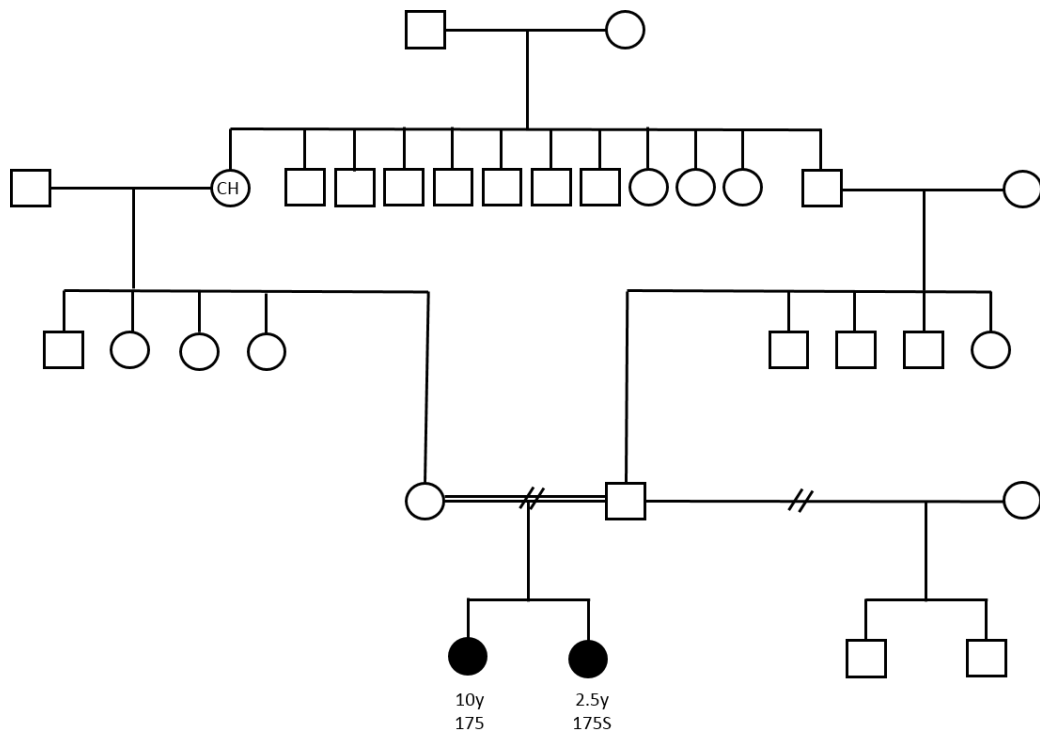

**Figure S2. Family pedigree of sisters 175 and 175S.**

Black filled circles represent sisters 175 and 175S whose parents are first cousins. Both siblings are homozygous for a single nucleotide deletion in exon 22 of MAGI2 gene. Mother of the siblings is heterozygous for the variant. DNA samples from other members of the family was not available. CH - Celiac and heart disease.

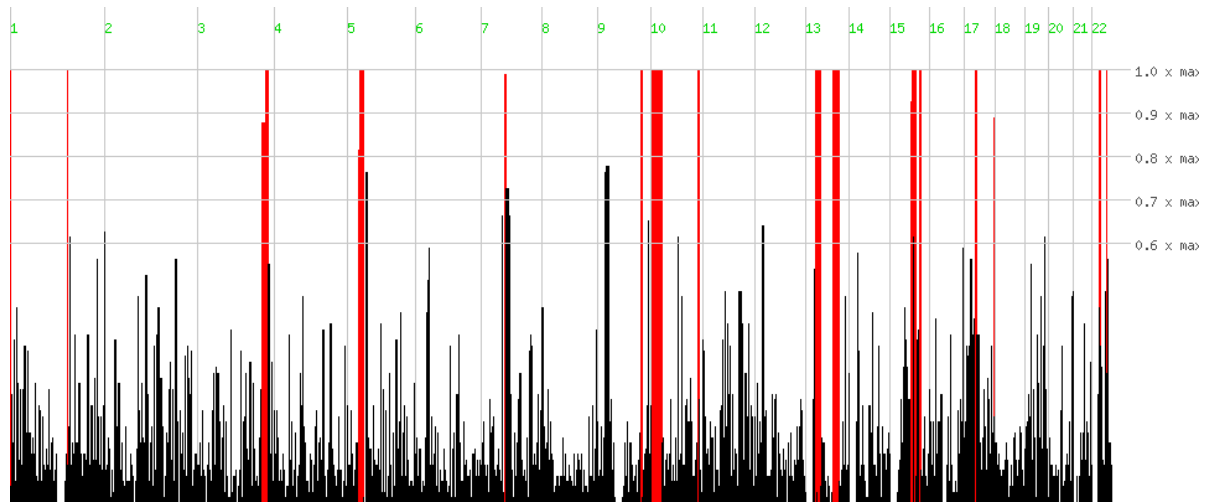

**Figure S3. Homozygosity plot.**

Homozygosity mapping (<http://www.homozygositymapper.org/>) was performed for individual 175 since the parents are first cousins. Homozygosity plot is shown with chromosome numbers presented on x-axis and score on y-axis. Red bars represent regions of homozygosity, which reach maximum significance (height of red bar) on chromosomes: 1, 3, 5, 9, 10, 13, 15, 17 and 22. Only 6 homozygous variants with MAF <0.01 were found within the homozygosity regions, none of these variants seemed however like a good SRNS gene candidate. One (*AKR1C1*, RS139588200) was found 9 times as a homozygote in ExAC and therefore not considered causative. Four other (*GABRD*, *POLR2M*, *RAD51D* and *NUP155*) were either found to be heterozygous or not present in the other affected sibling. One variant (*IGLL5* RS201956362 - not checked with Sanger sequencing here) affects not conserved amino acid and the substituted threonine is present in many other species at this position and therefore was not considered as likely causative in this patient.

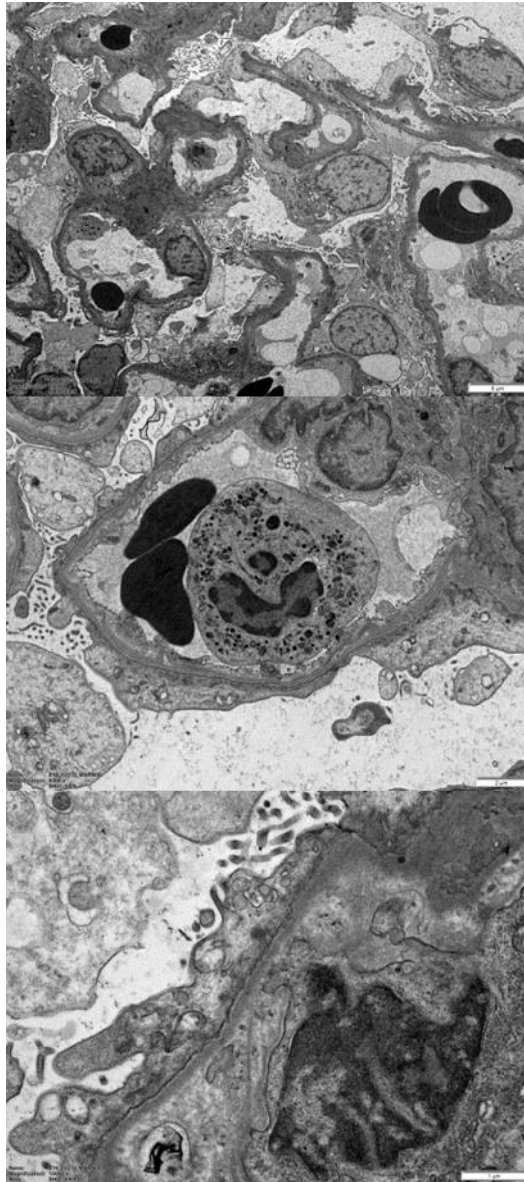

**Figure S4. Electron microscopy images of a renal biopsy sample from patient 180.**

One glomerulus was examined by electron microscope method. The mesangial area is normal and normocellular with no evidence of mesangial electron dense deposits. There are no peripheral electron dense deposits. The capillary loops are open and the endothelial fenestration is intact. The majority of the capillary loops have normal GBM (glomerular basement membrane). Diffuse podocyte foot process fusion is seen on the outer surface of the GBM.

## Immunohistochemistry with Santa Cruz MAGI2 antibody

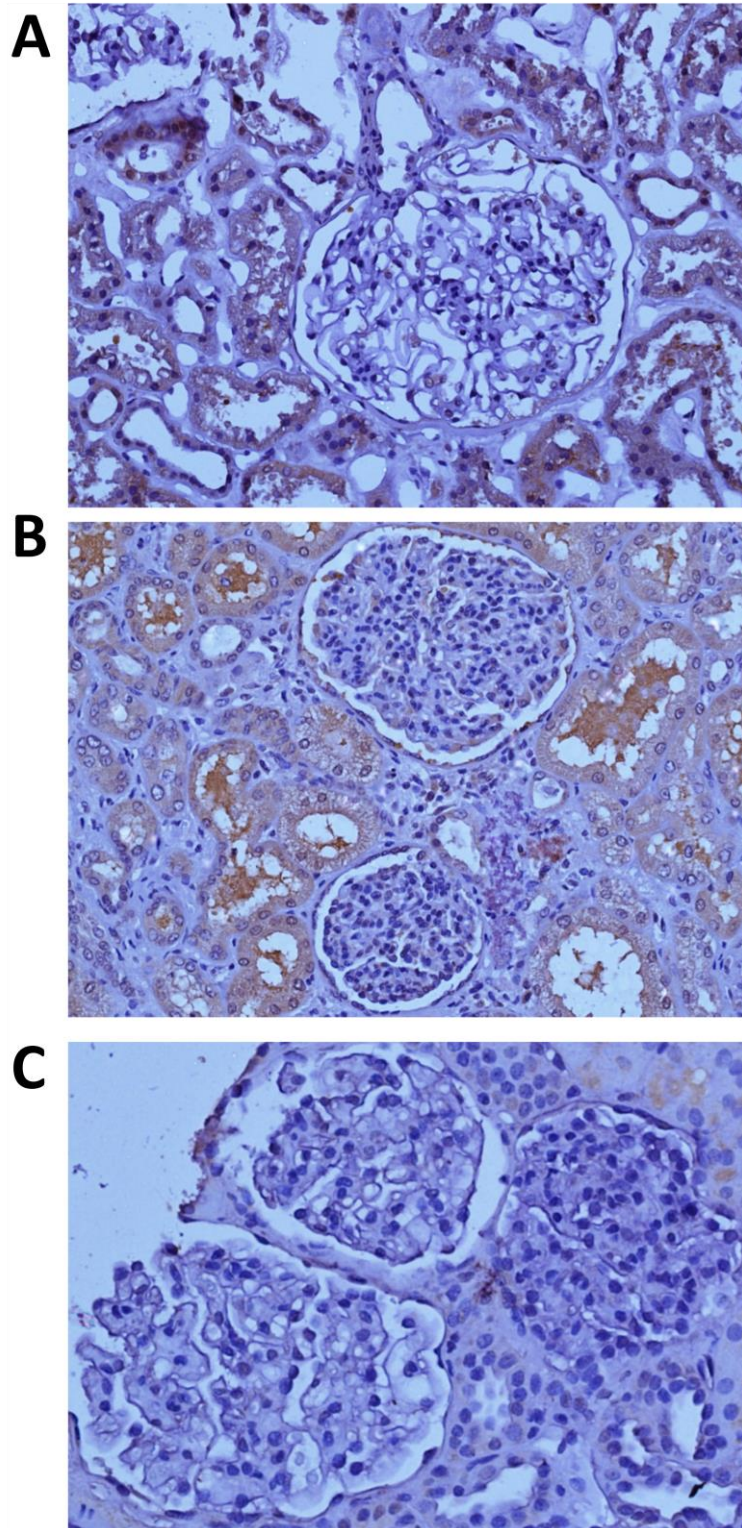

**Figure S5. MAGI2 (Santa Cruz) staining**

Immunohistochemical staining with human anti-MAGI2 antibody (Santa Cruz) is shown (20x). A - A kidney which was not suitable for transplant was used as a control. B - A nephrectomy specimen obtained from individual 175 (homozygous mutation in *MAGI2*). C - Biopsy specimen obtained from individual 180 (compound heterozygous mutation in *MAGI2*) shows relative absence of MAGI2.

| gene and variant                                                            | dbSNP144    | Phred scaled variant quality | ExAC frequency |               |                       |             | Additional significant information*                                                                                                                                                                                                                                                                                                                                                                                                                                                                                                                       |
|-----------------------------------------------------------------------------|-------------|------------------------------|----------------|---------------|-----------------------|-------------|-----------------------------------------------------------------------------------------------------------------------------------------------------------------------------------------------------------------------------------------------------------------------------------------------------------------------------------------------------------------------------------------------------------------------------------------------------------------------------------------------------------------------------------------------------------|
|                                                                             |             |                              | Allele count   | Allele Number | Number of homozygotes | Allele freq |                                                                                                                                                                                                                                                                                                                                                                                                                                                                                                                                                           |
| <i>KTN1</i> :NM_001079521:exon40:c.3697C>A:p.Leu1233Met                     | rs372815686 | 170                          | .              | .             | .                     | .           | Both variants are inherited from Mother (in cis conformation) and therefore not considered as likely causative here. Kinectin 1 (Kinesin Receptor). Mice homozygous for a targeted null mutation or a floxed allele exhibit no discernable phenotype; mice are viable and fertile up to one year of age. Expression: cells in glomeruli – medium/high; cells in tubules – medium/high                                                                                                                                                                     |
| <i>KTN1</i> :NM_001079521:exon6:c.964-7A>G                                  | rs569480873 | 192                          | 6              | 120590        | 0                     | 4.98E-05    |                                                                                                                                                                                                                                                                                                                                                                                                                                                                                                                                                           |
| <i>MAGI2</i> :NM_012301:exon1:c.64_71del:p.Arg22Glyfs*7                     | No          | 217                          | .              | .             | .                     | .           | This compound heterozygote is in trans. Deletion inherited from the Father and insertion from the Mother. Membrane Associated Guanylate Kinase, WW And PDZ Domain Containing 2. Mice homozygous for a knock-out allele die within 24 hours of birth and possess hippocampal neurons with altered dendritic spine morphology. Homozygotes for different knock-out allele die shortly after birth, exhibiting anuria, increased plasma creatinine levels, and abnormal podocyte morphology. Expression: cells in glomeruli – medium; cells in tubules – low |
| <i>MAGI2</i> :NM_012301:exon20:c.3526_3533dup:p.Glu1178Aspfs*9              | No          | 217                          | .              | .             | .                     | .           |                                                                                                                                                                                                                                                                                                                                                                                                                                                                                                                                                           |
| <i>MCC</i> :NM_001085377:exon1:c.58_63dup:p.Gly20_Gly21dup                  | No          | 217                          | .              | .             | .                     | .           | Both variants are inherited from Mother (in cis conformation) and therefore not considered as likely causative here. Mutated In Colorectal Cancers (MCC); Mice homozygous for hypomorphic or null mutations are viable and fertile with no gross abnormalities. Expression: cells in glomeruli – not detected/medium; cells in tubules – not detected/high                                                                                                                                                                                                |
| <i>MCC</i> :NM_001085377:exon6:c.994G>A:p.Glu332Lys,                        | RS185322500 | 156                          | 5              | 121250        | 0                     | 4.12E-05    |                                                                                                                                                                                                                                                                                                                                                                                                                                                                                                                                                           |
| <i>MICALCL</i> :NM_032867:exon3:c.1412_1413insTCC:p.Thr471_Ala472insPro (H) | No          | 80.4                         | .              | .             | .                     | .           | Similar inframe insertion around this region are present in ExAC and therefore this variant is less likely to be significant here. MICAL C-Terminal Like (MICALCL). <i>Variant not checked with Sanger sequencing.</i> Expression: cells in glomeruli – low; cells in tubules –high/medium                                                                                                                                                                                                                                                                |
| <i>ZIC5</i> :NM_033132:exon1:c.1248_1262del:p.Pro420_Pro424del              | rs778996938 | 217                          | .              | .             | .                     | .           | Deletion inherited from Father. Similar inframe insertion/deletions around this region are present in ExAC and therefore this variant is less likely to be significant here. p.Ser610Phe inherited from the Mother. Zic Family Member 5; Homozygous null mice display postnatal lethality and reduced life spans with exencephaly, abnormal cerebral cortex and diencephalon morphology, abnormal gait and posture, and impaired growth. Expression: cells in glomeruli – not available; cells in tubules – not available                                 |
| <i>ZIC5</i> :NM_033132:exon2:c.1829C>T:p.Ser610Phe                          | rs201876139 | 184                          | 63             | 121024        | 0                     | 0.00052     |                                                                                                                                                                                                                                                                                                                                                                                                                                                                                                                                                           |

**Table S3. Rare variants found in patient 180.**

H – homozygous, \* - Additional information obtained from GeneCards (<http://www.genecards.org/>) and Mouse Genome Informatics (<http://www.informatics.jax.org/>), ExAC - The Exome Aggregation Consortium (<http://exac.broadinstitute.org/>), The Human Protein Atlas (<http://www.proteinatlas.org/>)

| gene and variant                                                               | dbSNP144    | Phred scaled variant quality | ExAC frequency |               |                       |             | Additional significant information*                                                                                                                                                                                                                                                                                                                                                                                                                                                                       |
|--------------------------------------------------------------------------------|-------------|------------------------------|----------------|---------------|-----------------------|-------------|-----------------------------------------------------------------------------------------------------------------------------------------------------------------------------------------------------------------------------------------------------------------------------------------------------------------------------------------------------------------------------------------------------------------------------------------------------------------------------------------------------------|
|                                                                                |             |                              | Allele count   | Allele Number | Number of homozygotes | Allele freq |                                                                                                                                                                                                                                                                                                                                                                                                                                                                                                           |
| <i>AKR1C1</i> :NM_001353:exon5:c.509G>A:p.Arg170His (H) <sup>HM</sup>          | RS139588200 | 222                          | 912            | 121406        | 9                     | 0.007512    | Present 9 times as a homozygote in individuals without a kidney phenotype. Variant not considered significant and thus not checked for presence in 175S. Aldo-Keto Reductase Family 1, Member C1. Expression: cells in glomeruli – not detected; cells in tubules – high                                                                                                                                                                                                                                  |
| <i>GABRD</i> :NM_000815:exon3:c.C184C>T:p.Pro62Ser (H) <sup>HM, EA</sup>       | No          | 222                          | .              | .             | .                     | .           | Variant present within a homozygosity run. This variant is present as a <b>heterozygote</b> in the 175S. Gamma-Aminobutyric Acid (GABA) A Receptor, Delta. Expression: cells in glomeruli – not detected; cells in tubules – not detected                                                                                                                                                                                                                                                                 |
| <i>IGLL5</i> :NM_001178126:exon3:c.523G>A:p.Ala175Thr (H) <sup>HM</sup>        | RS201956362 | 222                          | 177            | 121084        | 0                     | 0.001462    | Substitution affects weakly conserved amino acid, Thr present in several species in this position. Variant not considered significant and thus not checked for presence in 175S. Immunoglobulin Lambda-Like Polypeptide 5. Expression: cells in glomeruli – not detected; cells in tubules – high                                                                                                                                                                                                         |
| <i>MAGI2</i> :NM_012301:exon22:c.3998delG:p.Gly1333Alafs*141 (H) <sup>EA</sup> | No          | 150                          | .              | .             | .                     | .           | Patient 175S is <b>also homozygous</b> for this deletion. Membrane Associated Guanylate Kinase, WW And PDZ Domain Containing 2. Mice homozygous for a knock-out allele die within 24 hours of birth and possess hippocampal neurons with altered dendritic spine morphology. Homozygotes for different knock-out allele die shortly after birth, exhibiting anuria, increased plasma creatinine levels, and abnormal podocyte morphology. Expression: cells in glomeruli – medium; cells in tubules – low |
| <i>NUP155</i> :NM_153485:exon6:c.723G>A:p.Gln241Gln (H) <sup>HM, EA</sup>      | No          | 222                          | .              | .             | .                     | .           | Variant present within a homozygosity run. This variant is <b>not</b> present in patient 175S. Nucleoporin 155kDa. Expression: cells in glomeruli – medium/low; cells in tubules – medium/low                                                                                                                                                                                                                                                                                                             |
| <i>POLR2M</i> :NM_015532:exon2:c.606G>A:p.Ala202Ala (H) <sup>HM, EA</sup>      | RS139384982 | 222                          | 4              | 121362        | 0                     | 0.00003296  | Variant present within a homozygosity run. This variant is present only as a <b>heterozygous</b> in the sister - 175S. Polymerase (RNA) II (DNA Directed) Polypeptide M. Expression: cells in glomeruli – not available; cells in tubules – not available                                                                                                                                                                                                                                                 |
| <i>RAD51D</i> :NM_002878:exon1:c.26G>C:p.Cys9Ser (H) <sup>HM, EA</sup>         | RS140825795 | 222                          | 42             | 119626        | 0                     | 0.0003511   | Variant present within a homozygosity run. This variant is <b>not</b> present in the sister-175S. RAD51 Paralog D. Expression: cells in glomeruli – not available; cells in tubules – not available                                                                                                                                                                                                                                                                                                       |
| <i>SKOR1</i> :NM_001258024:exon5:c.775A>C:p.Lys259QGln <sup>EA</sup>           | RS776369126 | 215                          | 1              | 110882        | 0                     | 0.000009019 | Both variants are present also in the sister 175S and their mother thus both variants are on the <b>same allele</b> . SKI Family Transcriptional Corepressor 1. Expression: cells in glomeruli – not detected; cells in tubules – not detected                                                                                                                                                                                                                                                            |
| <i>SKOR1</i> :NM_001258024:exon2:c.80G>C:p.Arg27Thr <sup>EA</sup>              | No          | 174                          | .              | .             | .                     | .           |                                                                                                                                                                                                                                                                                                                                                                                                                                                                                                           |

**Table S4. Rare variants found in patient 175**

H – homozygous, \* - Additional information obtained from GeneCards (<http://www.genecards.org/>) and Mouse Genome Informatics (<http://www.informatics.jax.org/>), ExAC - The Exome Aggregation Consortium (<http://exac.broadinstitute.org/>), The Human Protein Atlas (<http://www.proteinatlas.org/>). HM – variants within



homozygosity stretches, EA – variants found through exome analysis. *AKR1C1* and *IGLL5* were not checked with Sanger sequencing. Only *MAGI2* deletion was found in both siblings (175 and 175S).

### Supplementary References:

1. McCarthy, HJ, Bierzynska, A, Wherlock, M, Ognjanovic, M, Kerecuk, L, Hegde, S, Feather, S, Gilbert, RD, Krischock, L, Jones, C, Sinha, MD, Webb, NJ, Christian, M, Williams, MM, Marks, S, Koziell, A, Welsh, GI, Saleem, MA, Group, RtUSS: Simultaneous sequencing of 24 genes associated with steroid-resistant nephrotic syndrome. *Clinical journal of the American Society of Nephrology : CJASN*, 8: 637-648, 2013.
2. Sadowski, CE, Lovric, S, Ashraf, S, Pabst, WL, Gee, HY, Kohl, S, Engelmann, S, Vega-Warner, V, Fang, H, Halbritter, J, Somers, MJ, Tan, W, Shril, S, Fessi, I, Lifton, RP, Bockenhauer, D, El-Desoky, S, Kari, JA, Zenker, M, Kemper, MJ, Mueller, D, Fathy, HM, Soliman, NA, Group, SS, Hildebrandt, F: A single-gene cause in 29.5% of cases of steroid-resistant nephrotic syndrome. *Journal of the American Society of Nephrology : JASN*, 26: 1279-1289, 2015.
3. Gee, HY, Zhang, F, Ashraf, S, Kohl, S, Sadowski, CE, Vega-Warner, V, Zhou, W, Lovric, S, Fang, H, Nettleton, M, Zhu, JY, Hoefele, J, Weber, LT, Podracka, L, Boor, A, Fehrenbach, H, Innis, JW, Washburn, J, Levy, S, Lifton, RP, Otto, EA, Han, Z, Hildebrandt, F: KANK deficiency leads to podocyte dysfunction and nephrotic syndrome. *The Journal of clinical investigation*, 125: 2375-2384, 2015.
4. Miyake, N, Tsukaguchi, H, Koshimizu, E, Shono, A, Matsunaga, S, Shiina, M, Mimura, Y, Imamura, S, Hirose, T, Okudela, K, Nozu, K, Akioka, Y, Hattori, M, Yoshikawa, N, Kitamura, A, Cheong, HI, Kagami, S, Yamashita, M, Fujita, A, Miyatake, S, Tsurusaki, Y, Nakashima, M, Saitsu, H, Ohashi, K, Imamoto, N, Ryo, A, Ogata, K, Iijima, K, Matsumoto, N: Biallelic Mutations in Nuclear Pore Complex Subunit NUP107 Cause Early-Childhood-Onset Steroid-Resistant Nephrotic Syndrome. *American journal of human genetics*, 97: 555-566, 2015.
5. Braun, DA, Sadowski, CE, Kohl, S, Lovric, S, Astrinidis, SA, Pabst, WL, Gee, HY, Ashraf, S, Lawson, JA, Shril, S, Airik, M, Tan, W, Schapiro, D, Rao, J, Choi, WI, Hermle, T, Kemper, MJ, Pohl, M, Ozaltin, F, Konrad, M, Bogdanovic, R, Buscher, R, Helmchen, U, Serdaroglu, E, Lifton, RP, Antonin, W, Hildebrandt, F: Mutations in nuclear pore genes NUP93, NUP205 and XPO5 cause steroid-resistant nephrotic syndrome. *Nature genetics*, 2016.
6. Colin, E, Huynh Cong, E, Mollet, G, Guichet, A, Gribouval, O, Arrondel, C, Boyer, O, Daniel, L, Gubler, MC, Ekinci, Z, Tsimaratos, M, Chabrol, B, Boddaert, N, Verloes, A, Chevrollier, A, Gueguen, N, Desquiret-Dumas, V, Ferre, M, Procaccio, V, Richard, L, Funalot, B, Moncla, A, Bonneau, D, Antignac, C: Loss-of-function mutations in WDR73 are responsible for microcephaly and steroid-resistant nephrotic syndrome: Galloway-Mowat syndrome. *American journal of human genetics*, 95: 637-648, 2014.
7. Bierzynska, A, Soderquest, K, Koziell, A: Genes and podocytes - new insights into mechanisms of podocytopathy. *Frontiers in endocrinology*, 5: 226, 2014.
8. De Mutiis, C, Pasini, A, La Scola, C, Pugliese, F, Montini, G: Nephrotic-range Albuminuria as the presenting symptom of Dent-2 disease. *Italian journal of pediatrics*, 41: 46, 2015.
